# Supplementary material for: Cell surface marker-based capture of neoantigen-reactive CD8+ T-cell receptors from metastatic tumor digests
Source: PubMed Central journal article supplement — J Immunother Cancer. 2023 May 31;11(5):e006264. doi: 10.1136/jitc-2022-006264 (PMC10255266; doi:10.1136/jitc-2022-006264), 2023-05-31
Supplement: jitc-2022-006264supp006.pdf [file jitc-2022-006264supp006.pdf]

Supplementary Table 1

| Sample | Histology  | Figure 1 UMAP | Figure 3A FACS Analysis | CD39/CD103 FACS Analysis | Sequencing of TIL <sup>TP</sup> Cells | <i>In vitro</i> Expansion & Testing |
|--------|------------|---------------|-------------------------|--------------------------|---------------------------------------|-------------------------------------|
| 4323   | Colorectal | X             | X                       | X                        | X                                     | X                                   |
| 4400   | Colorectal | X             | X                       | X                        | X                                     | X                                   |
| 4385   | Colorectal | X             | X                       | X                        | X                                     | X                                   |
| 4317   | Colorectal | X             | X                       |                          | X                                     | X                                   |
| 4382   | Colorectal | X             | X                       |                          | X                                     |                                     |
| 4324   | Colorectal |               | X                       |                          |                                       |                                     |
| 4419   | Pancreatic |               | X                       |                          |                                       |                                     |
| 4420   | Colorectal |               | X                       |                          |                                       |                                     |
| 4394   | Colorectal |               | X                       |                          |                                       |                                     |
| 4393   | Colorectal |               |                         | X                        |                                       |                                     |
