# Supplementary figures and images for: Cell surface marker-based capture of neoantigen-reactive CD8+ T-cell receptors from metastatic tumor digests
Source: PubMed Central journal article supplement — J Immunother Cancer. 2023 May 31;11(5):e006264. doi: 10.1136/jitc-2022-006264 (PMC10255266; doi:10.1136/jitc-2022-006264), 2023-05-31

## Supplementary Figure 1

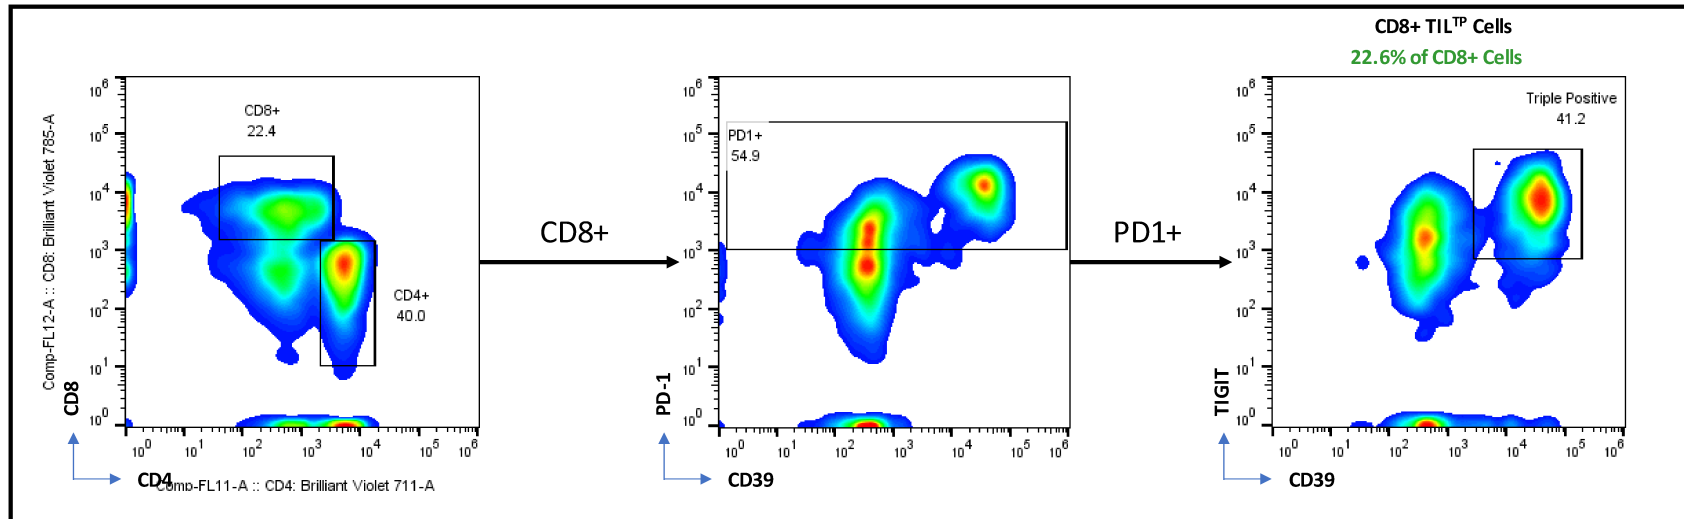

Supplement: jitc-2022-006264supp001.pdf [file jitc-2022-006264supp001.pdf]

Supplementary Figure 2

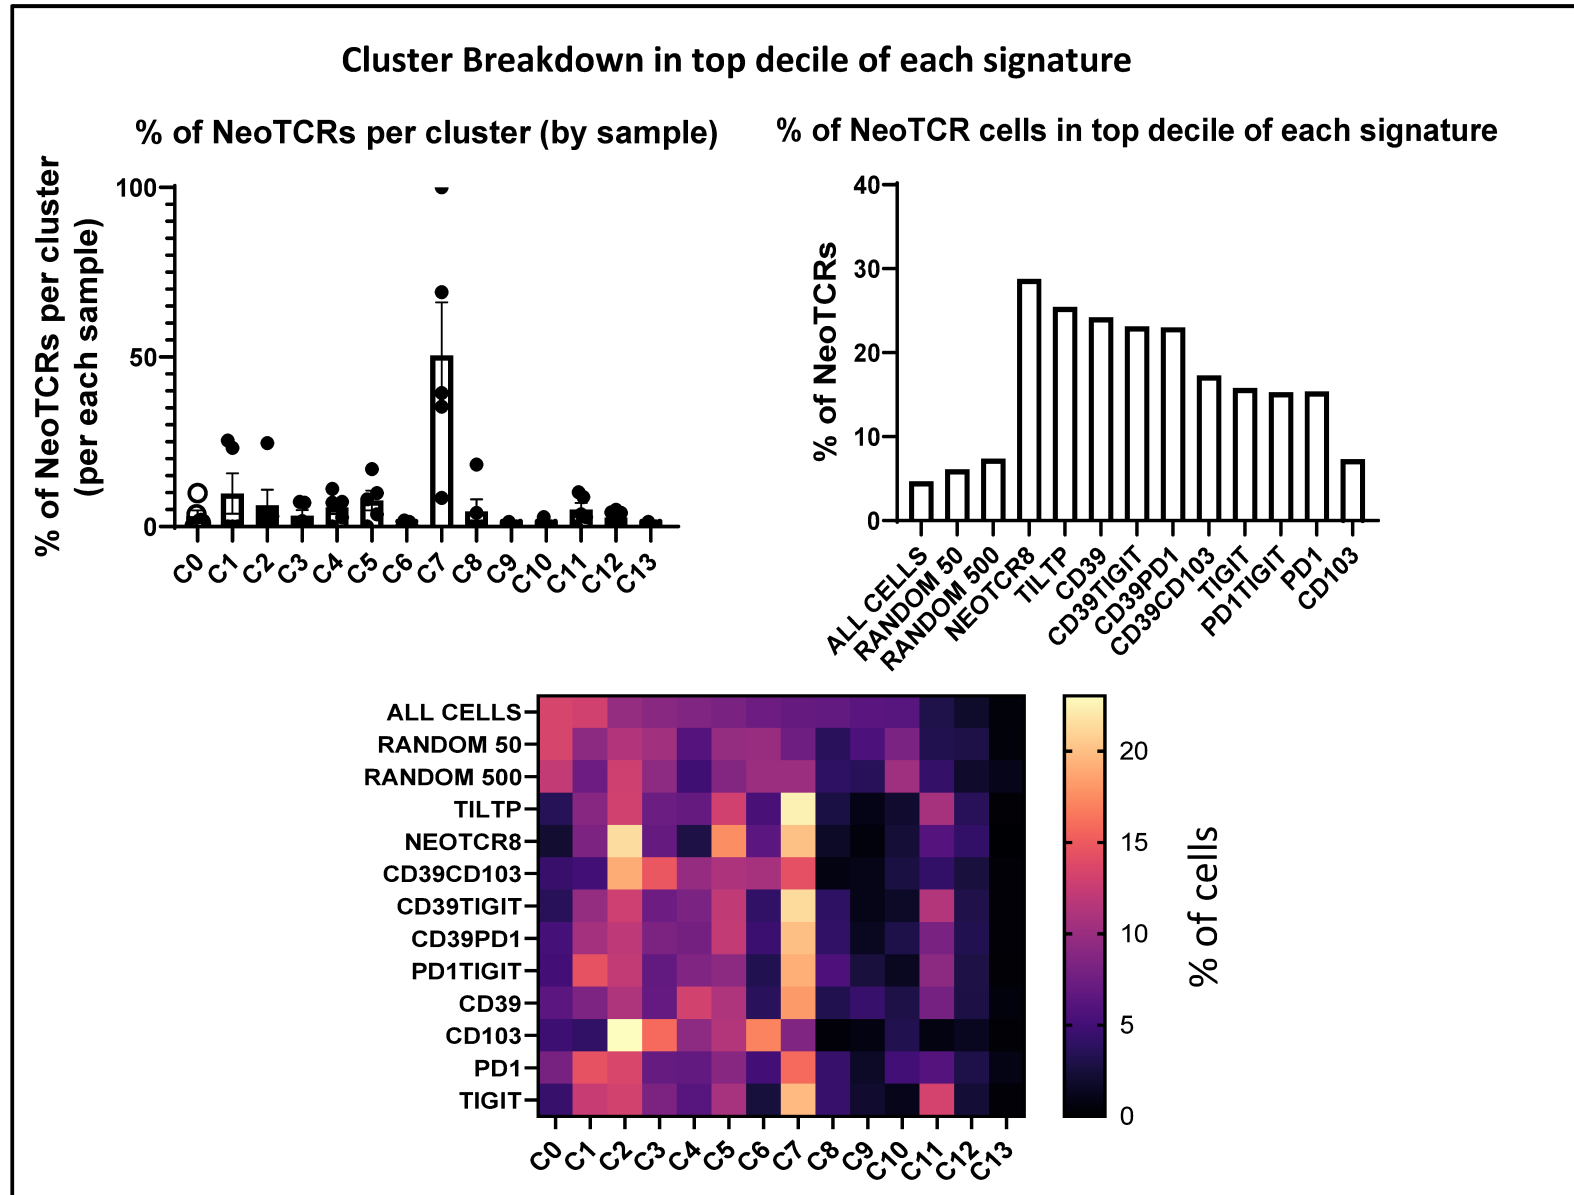

Supplement: jitc-2022-006264supp002.pdf [file jitc-2022-006264supp002.pdf]

## Supplementary Figure 3

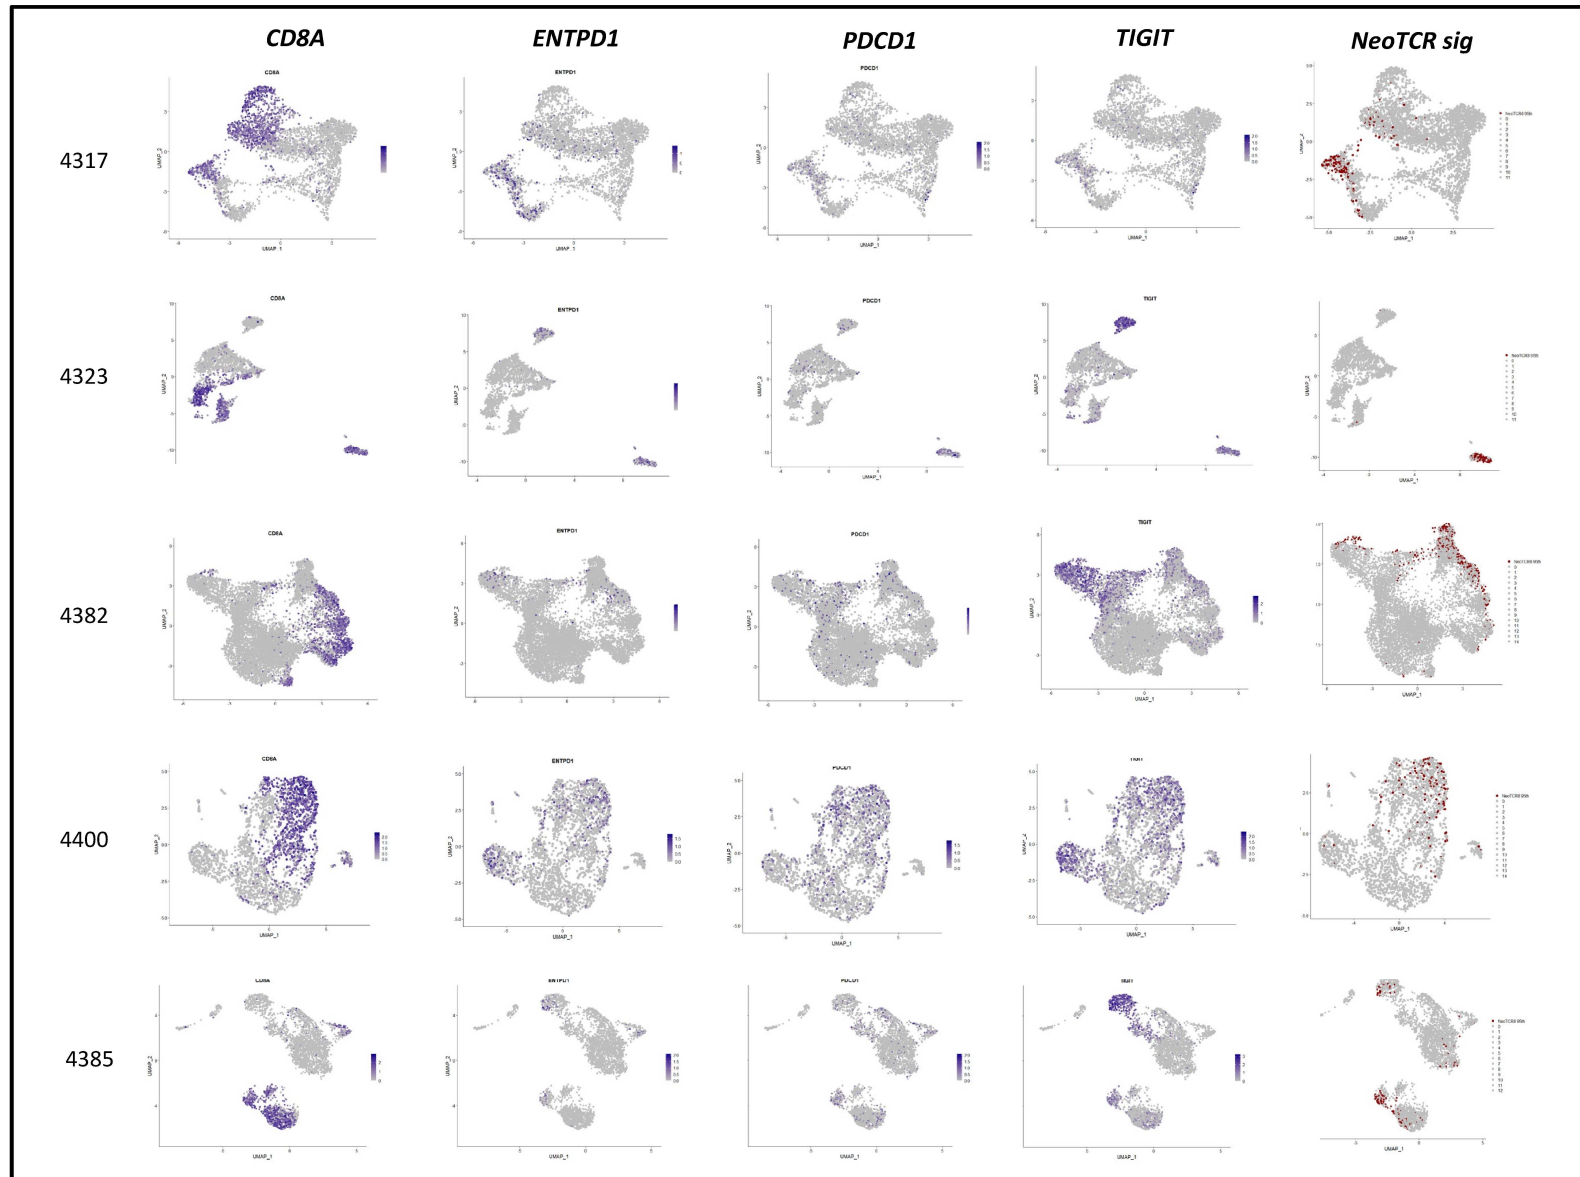

Supplement: jitc-2022-006264supp003.pdf [file jitc-2022-006264supp003.pdf]

Supplementary Figure 4

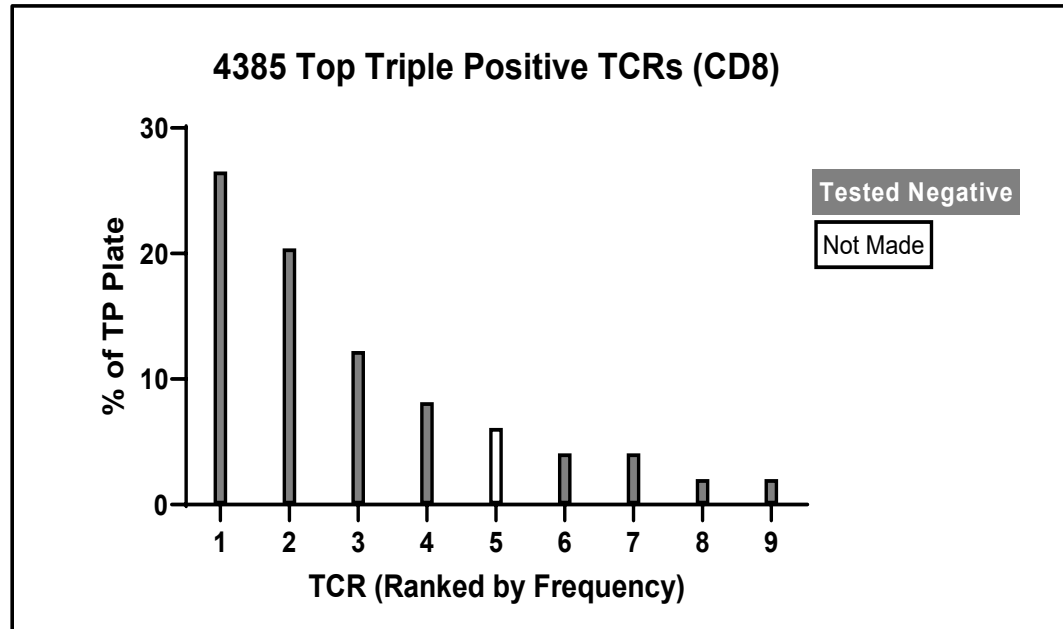

Supplement: jitc-2022-006264supp004.pdf [file jitc-2022-006264supp004.pdf]

Supplementary Figure 5

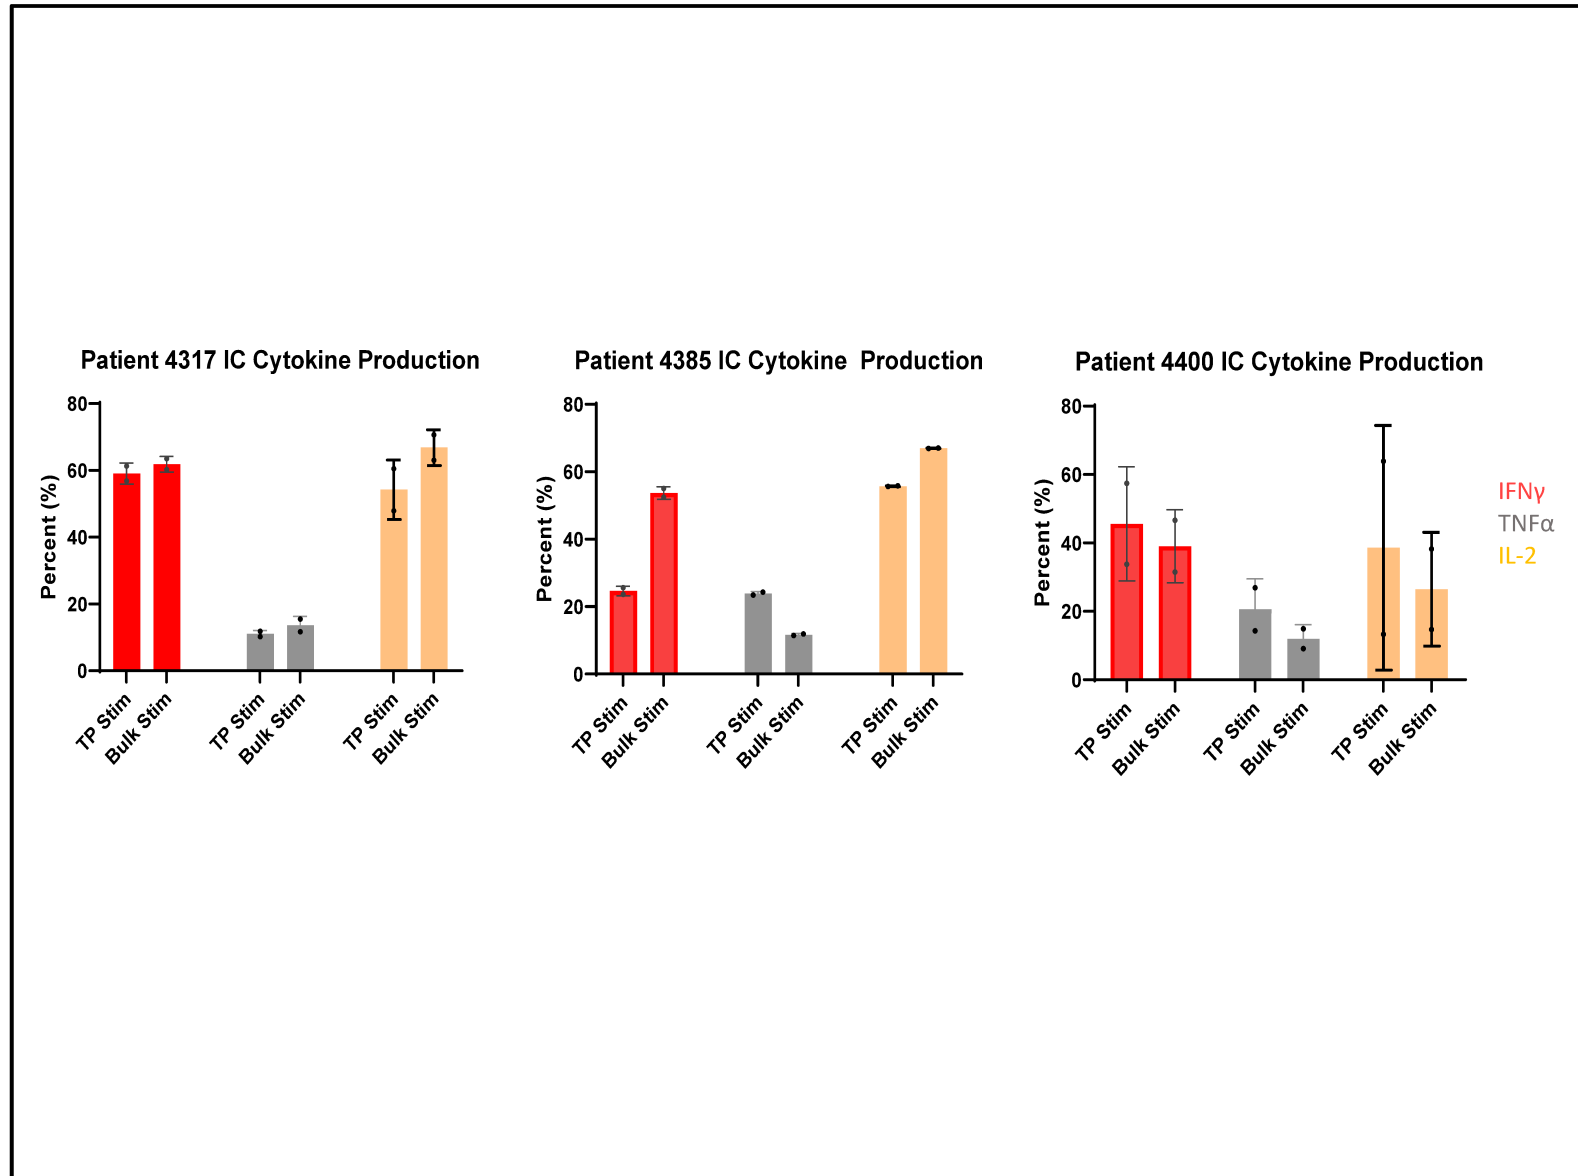

Supplement: jitc-2022-006264supp005.pdf [file jitc-2022-006264supp005.pdf]
